# Supplementary material
Source: Royal Society of Chemistry journal article supplement (doi:10.1039/d5nr05495h)
Supplement: d5nr05495h1.pdf [file d5nr05495h1.pdf]

## Supplementary information

### **A Synergistic multiparametric MRI Strategy for FAP $\alpha$ -Targeted tumor fibrosis based on NaGdF<sub>4</sub>@PEG-FAPI Nanoprobes**

Yuqiang Ma<sup>#a</sup>, Ni Zhang<sup>#b</sup>, Shuai Wu<sup>a</sup>, Jingwen He<sup>a</sup>, YuHang Jiang<sup>a</sup>, Meng Qin<sup>b</sup>, Hongxiang Feng<sup>c\*</sup>,  
Wenyue Li<sup>a\*</sup>, Yi Hou<sup>a\*</sup>

<sup>a</sup>College of Life Science and technology, Beijing University of chemical technology, Beijing 100029, China.

<sup>b</sup>West China Hospital of Sichuan University, Chengdu, 610041, China.

<sup>c</sup>Department of Thoracic Surgery, China-Japan Friendship Hospital, Beijing, 100029, China.

Email: [fenghongxiang617@126.com](mailto:fenghongxiang617@126.com); [Wenyue.Lee@outlook.com](mailto:Wenyue.Lee@outlook.com); [houyi@iccas.ac.cn](mailto:huyi@iccas.ac.cn).

<sup>#</sup> These authors contributed equally to this work.

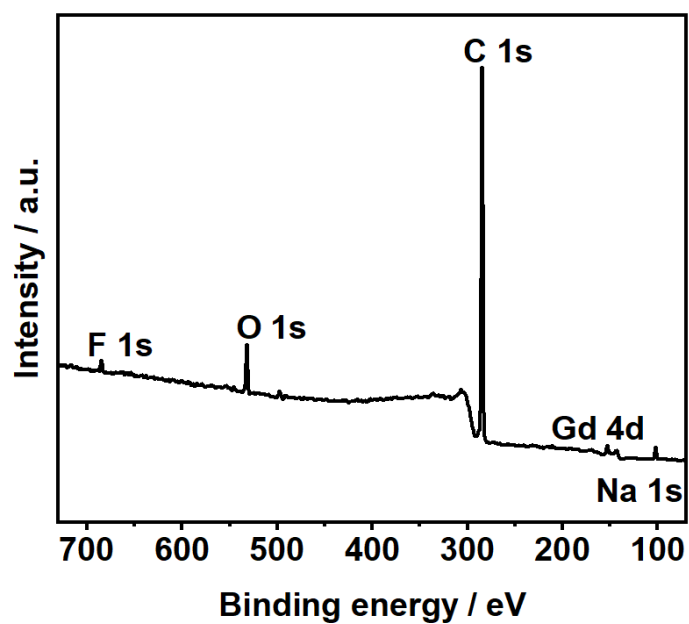

**Figure S1.** NaGdF<sub>4</sub>@OA X-ray photoelectron spectroscopy (XPS) image of nanocrystals.

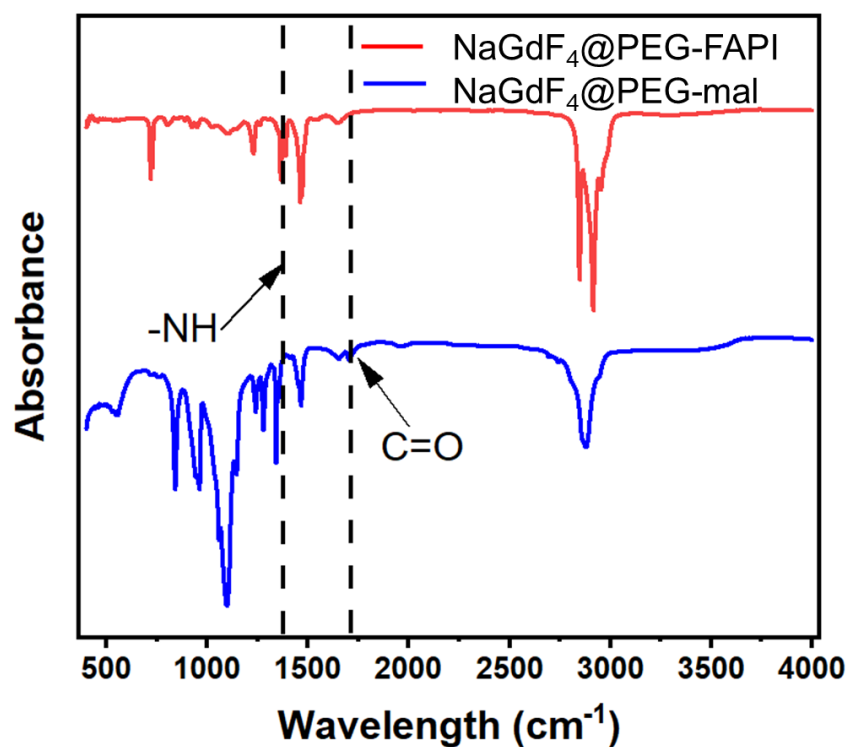

**Figure S2.** The fourier transform infrared spectroscopy (FT-IR) image of NaGdF<sub>4</sub>@PEG-FAPI and NaGdF<sub>4</sub>@PEG-mal.

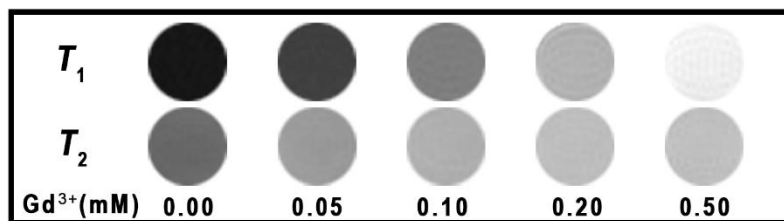

**Figure S3.** Grayscale image of the relaxivity of the  $NaGdF_4@PEG-FAPI$  nanoprobe.

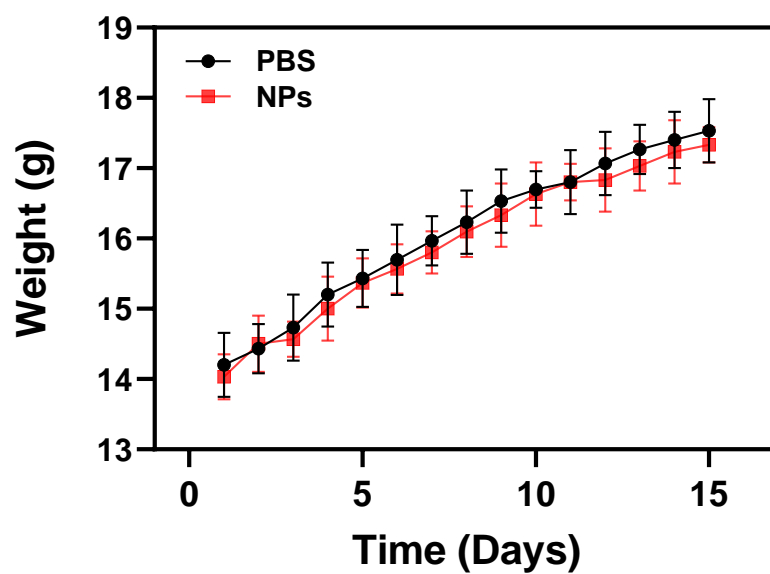

**Figure S4.** Weight change curve of mice injected with  $NaGdF_4@PEG-FAPI$  nanoprobe or PBS.

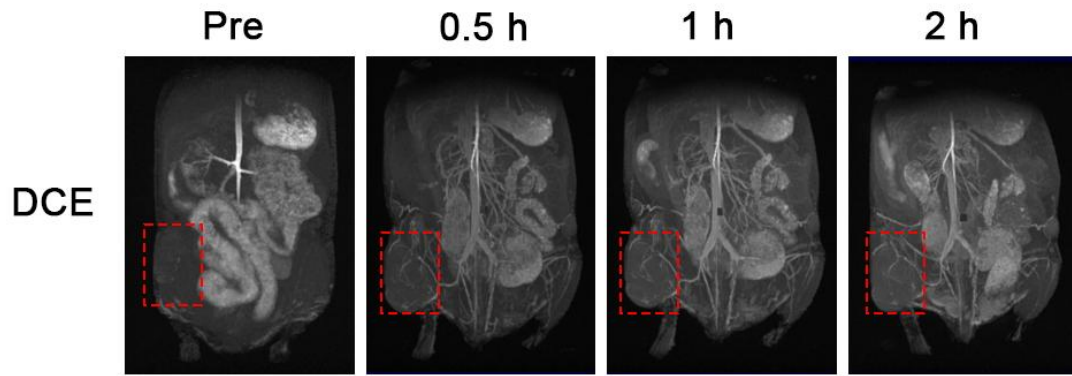

**Figure S5.** DCE sequence images of 4T1 model mice before and after injection of  $\text{NaGdF}_4@$ PEG-FAPI.
